# Supplementary material for: The Driving Forces of Road Safety Volunteers: Resilience, Coping Mechanisms, Well-being and Education
Source: Research Square preprint supplement (doi:10.21203/rs.3.rs-4681792/v1), 2024-07-22
Supplement: Supplementary file 1 [file de08937d9c6ac7e486617330.docx]

VOLUNTEER INTERVIEW QUESTIONS

1. Can you tell me about yourself?

2. Background information: gender, age, volunteering period (years and hours per week), driving experience (years), family status and place of residence and volunteering.

3. Why did you want to become a volunteer? Why did you want to volunteer as safety guard?

4. How much time to you volunteer? Can you tell me about your training process?

5. which aspects of volunteering you like or dislike the most? Please give examples.

6. what relevant characters and experience do you have that help you to be a great volunteer?

7. Give me an example of a situation where your skills proved crucial to a positive outcome.

8. what makes a good volunteer's team?

9. can you tell me about a time when you delt with difficult situation while volunteering?

10. Give me an example of a conflict situation or confrontation with drivers.

11. what makes a good volunteer's team?

12. That is the end of your interview. Do you want to add something?

13. Do you have and questions?
