# Supplementary material for: The Driving Forces of Road Safety Volunteers: Resilience, Coping Mechanisms, Well-being and Education
Source: Research Square preprint supplement (doi:10.21203/rs.3.rs-4681792/v1), 2024-07-22
Supplement: Supplementary file 2 [file f1885f788bf97e2c0cc80b36.docx]

| **Table 1.**  **Coding Scheme for motivations, challenges and perceptions of the role of road safety volunteers** | | | |
| --- | --- | --- | --- |
| **Coding Scheme** | | | |
| **Theme** | **Theme Content** | **Subthemes** | **Interater agreement** |
| **The Driving Forces**  **Challenges and Coping Mechanisms** | Participants refer to the intrinsic motivation and dedication behind their voluntary engagement  Participants describe both, difficulties they encounter and coping strategies, while fulfilling their volunteer responsibilities | Sense of purpose  Social engagement  Educational role  Training gaps and legal protections  Coping strategies and resilience  Peer support and solidarity | 96%  92%  90%  95%  90%  89% |
| **Multifaceted Benefits** | Participants refer to benefits and advantages resulting from their volunteering | Positive community impact  Social connectivity | 90%  89% |
|  | | | |
